## The Michaelis-Menten paradox: $K_m$ is not an equilibrium constant but a steady-state constant.

Enric I. Canela<sup>1,2</sup>, Gemma Navarro<sup>2,3</sup>, José Luis Beltrán<sup>4</sup>, Rafael Franco<sup>\*1,2</sup>

### ABSTRACT

**The Michaelis-Menten constant ( $K_m$ ), the concentration of substrate ([S]) providing half of enzyme maximal activity, is higher than the  $ES \rightarrow E+S$  dissociation equilibrium constant. Actually,  $K_m$  should be defined as the constant defining the steady state in the  $E+S=ES \rightarrow E+P$  model and, accordingly, caution is needed when  $K_m$  is used as a measure of the "affinity" of the enzyme-substrate interaction.**

At Chemistry, Biology, Pharmacy and even Medicine schools, enzyme kinetics is taught according the visionary work of Briggs and Haldane and of Michaelis and Menten<sup>1</sup>. The key formula given to students consists of a hyperbolic relationship between enzyme activity ( $v$ ) and substrate concentration ([S]):

$$v = \frac{V_{max}[S]}{K_m + [S]} \quad (1)$$

where  $V_{max}$  is the maximal activity and  $K_m$  the Michaelis constant.  $K_m$  is a function of the kinetic constants of the elementary steps in:

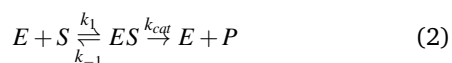

Being  $k_{(S)}$  the kinetic constant of every step,  $K_m$  becomes:

$$K_m = \frac{k_{-1} + k_{cat}}{k_1} \quad (3)$$

At the beginning of the 20th century Michaelis-Menten<sup>2</sup> did pioneer enzymology research and provided tools to calculate related parameters. On the one hand, the report was written in German and, accordingly, only available

to those able to read in this idiom. Fortunately, the work of Johnson and Goody<sup>3</sup> included the translation of the original work, thus being relevant for scientists to make them aware of the message provided by Michaelis and Menten. On the other hand, the way of presenting data was very different to that used 100 years later.

Therefore, many of enzymologists may not be aware of the meaning of the parameter "invented" by Michaelis and Menten, which was not  $K_m$ . As described by Johnson and Goody<sup>3</sup>: "Rather, they derived  $V_{max}/K_m$ , a term we now describe as the specificity constant,  $k_{cat}/K_m$ , multiplied by the enzyme concentration...".

For the purpose of this article it does not matter the actual concentration of the enzyme, but to simplify, we use  $[E]=1$ . Then, the specificity constant,  $k_{cat}/K_m$  provided by Michaelis and Menten<sup>2</sup> would be:  $k_{cat}/K_m \times 1 = k_{cat}/K_m$ .

The Michaelis-Menten paradox basically consists of deciphering  $K_m$ 's mechanistic meaning; the challenge being to solve it for validity in *in vitro* and *in vivo* conditions. It must be calculated in isolated systems measuring initial rates at different concentrations and fitting data to the Michaelis-Menten equation.

Back for decades, linearizations (e.g. the Lineweaver-Burk linearization<sup>4</sup>, reported 20 years after the Michaelis-Menten paper) were instrumental for parameter determination. As commented elsewhere<sup>5</sup> the Eadie-Hofstee linearization introduces much less error in parameter estimation. At present, data must be fitted directly to the Michaelis-Menten equation using non-linear regression. But which are the data to be fitted? In brief, data for each substrate concentration must be taken from initial values ( $v_0$ ), i.e. using the slope of the linear part of the plot of substrate disappearance (or product formation) versus time. Thus, data consists of pairs of substrate concentration and slopes of increment of product (or decrement of substrate) with time.

Our first aim was to understand the range of  $k_1$  values when  $k_{cat}$  is higher, similar or negligible in comparison with  $k_{-1}$ . We have used the equation 1 to calculate several  $v_0/[S]$  data pairs for  $K_m = 50\mu M$  and  $k_{cat} = 300s^{-1}$ . Taking into account equation 3, we considered 5 possibilities: i)  $k_{cat} = k_{-1}/10$ , ii)  $k_{cat} = k_{-1}/5$ , iii)  $k_{cat} = k_{-1}/2$ , iv)  $k_{cat} = k_{-1}$ , v)  $k_{cat} = 2k_{-1}$ . The calculated  $k_1$  values are shown in table 1.

If  $K_m$  is fixed as  $25\mu M$  and  $k_{cat}$  kept at  $300s^{-1}$ , the trend is similar and the respective  $k_1$  values in the 3000 – 150 range of  $k_{-1}$  values (as in table 1) are:  $1.3 \times 10^8$ ,  $7.2 \times 10^7$ ,  $3.6 \times 10^7$ ,  $2.4 \times 10^7$  and  $1.8 \times 10^7 M^{-1}s^{-1}$ . These results indicate that values of  $k_{cat}$  going from similar or significantly lower (1/10) values than  $k_{-1}$  do not severely impact on  $k_1$  values. In fact, at either 25 or  $50\mu M$   $K_m$  value, a 20-fold change in  $k_{cat}/k_{-1}$  ratio results in a change of only 7-fold in  $k_1$  values.

A much higher difference in values, for instance  $k_{-1}$  being 100 times higher than  $k_{cat}$  would indeed lead to a marked impact in the calculated  $k_1$  value (67-fold difference). In summary, enormous  $k_{cat}$  vs.  $k_{-1}$  differences are required to make  $K_m$  close to  $k_{-1}/k_1$  ( $K_d$ ), i.e. close to a real equilibrium constant. A difference

<sup>1</sup> Molecular Neurobiology laboratory. Department of Biochemistry and Molecular Biomedicine, Biology School, University of Barcelona, Barcelona, Spain.

<sup>2</sup> Centro de Investigación en Red, Enfermedades Neurodegenerativas (CIBERNED), Instituto de Salud Carlos III, Madrid, Spain.

<sup>3</sup> Department of Biochemistry and Physiology, Pharmacy and Food Science School, University of Barcelona, Barcelona, Spain.

<sup>4</sup> Department of Chemical Engineering and Analytical and Chemistry. Faculty of Chemistry. University of Barcelona, Barcelona, Spain.

\* Corresponding author:

Rafael Franco, Dept. Biochemistry and Molecular Biomedicine. School of Biology. University of Barcelona. Avda. Diagonal 643. Prevosti Building. 08028 Barcelona. Spain. Phone: +34934021208, E-mail addresses: rfranco@ub.edu; rfranco123@gmail.com

**Table 1**  $k_{-1}$  and  $K_d$  values calculated for  $K_m = 50 \mu M$  and  $k_{cat} = 300 s^{-1}$ , and varying  $k_1$  from 3000 to  $150 s^{-1}$

| $k_{-1} (s^{-1})$    | 3000             | 1500             | 600              | 300              | 150              |
|----------------------|------------------|------------------|------------------|------------------|------------------|
| $k_1 (M^{-1}s^{-1})$ | $6.7 \cdot 10^7$ | $3.7 \cdot 10^7$ | $1.9 \cdot 10^7$ | $1.3 \cdot 10^7$ | $9.0 \cdot 10^6$ |
| $K_d$                | $4.5 \cdot 10^5$ | $4.1 \cdot 10^5$ | $3.2 \cdot 10^5$ | $2.4 \cdot 10^5$ | $1.7 \cdot 10^5$ |

in  $k_{-1}$  values of 4 orders of magnitude (from 3 to  $30,000 s^{-1}$ ) leads to a two-orders-of-magnitude range in  $k_1$  values, calculated from equation 3 (from 6.06 to 606, Figure 1).

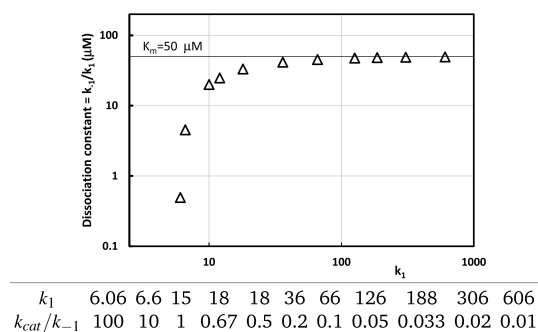

**Fig. 1** Dissociation equilibrium constant for different values of  $k_{-1}$   $k_1$  values at different  $k_{cat}/k_{-1}$  ratios (indicated below X-axis) were calculated for  $k_{cat} = 300 s^{-1}$  and  $K_m = 50 \mu M$ , using eq. 3.

More importantly, the  $(k_{-1}/k_1)$  quotient may be quite different from the  $K_m$  value (Fig. 1):  $K_m$  would be 20 and  $45.4 \mu M$  for  $k_{-1} = 200$  and  $3,000 s^{-1}$ , respectively. Only for  $k_{-1} \geq 6000$  ( $k_{cat}/k_{-1} = 0.05$ ) the  $k_{-1}/k_1$  ratio ( $K_d$ ) approaches the  $K_m$  value (Figure 1). In summary,  $K_m$  being close to an equilibrium constant requires low values of  $k_{cat}$ . Do they really occur in either *in vitro* or *in vivo* conditions?  $k_{cat}$  is the number of molecules of product formed per one molecule of enzyme in one time unit. Enzymes are very efficient and  $k_{cat}$  values may be measured in hundreds/thousands per second. Obviously, exceptions occur and  $k_{cat}$  may be lower (e.g., structurally complex substrates). We had extensive experience with adenosine deaminase, whose congenital deficit produces severe combined immunodeficiency<sup>6</sup>. In this case,  $k_{cat}$  is in the order of hundreds in  $s^{-1}$  units (251), for the most common substrate, adenosine, and 283 for a structural analog, 2'-deoxyadenosine<sup>7,8</sup>.  $K_m$  values for these compounds are in the 20-30  $\mu M$  range, in close agreement with our own results<sup>9,10</sup>. 250 molecules of adenosine transformed every second by one enzyme molecule is not negligible in absolute terms. May 250  $s^{-1}$  be negligible due to the fact that the  $k_{-1}$  value is significantly higher? Using stopped-flow spectrofluorometer measurements using pure adenosine deaminase from calf intestine, it was reported<sup>7</sup> that  $k_{cat} = 244 s^{-1}$ ,  $k_1 = 3.1 \times 10^7 M^{-1} s^{-1}$  and  $k_{-1} = 500 s^{-1}$ . Then  $k_{cat}$  is not negligible in front of  $k_{-1}$ , and the constants would be  $K_d = 16 \mu M$  and  $K_m = 24 \mu M$ , i.e.  $K_m$  would be a 33% higher than  $K_d$ . While the  $k_{cat}$  value is easy to calculate, technical issues make difficult to make reliable estimations of  $k_1$  and  $k_{-1}$ , and any miscalculation in these rate constants would affect the distance between  $K_m$  and  $K_d$  values. Hence, the message is that two substrates having similar  $K_d$  values, the one with lower  $k_1$  will lead to a higher  $K_m$ , and vice versa.

As also commented below using a different reasoning, the substrate with quickest association kinetics will display a lower  $K_m$  in *in vitro* assays. Our next aim was to fit *in silico*-generated data pairs of  $v_0/[S]$  to obtain  $K_m$  by non-linear regression fit to the Michaelis-Menten equation, or to the equation obtained from substituting  $K_m$  by the expression indicated in equation 3:

$$v_0 = \frac{V[S]}{K_m + [S]} = \frac{V[S]}{\frac{k_{-1} + k_{cat}}{k_1} + [S]} \quad (4)$$

In both cases the parameters were refined by using the macro ref\_GN\_LM<sup>11</sup>, which consists of an adaptation of Levenberg-Marquardt modification of the Gauss-Newton iterative algorithm<sup>12</sup>, for use under the MS Excel<sup>TM</sup> spreadsheet. In order to compare results, we have tested two different objective functions, the first one defined as the sum of squared errors ( $U$ ); in the second case, the function to be minimized is the sum of squared relative errors ( $U_{rel}$ ):

$$U = \sum_{i=1}^n (v_{i,exp} - v_{i,calc})^2 \quad U_{rel} = \sum_{i=1}^n \left( \frac{v_{i,exp} - v_{i,calc}}{v_{i,exp}} \right)^2 \quad (5)$$

where  $n$  is the number of data points,  $v_{i,exp}$  the experimental value of the  $i$ -point, and  $v_{i,calc}$  the calculated after the model (eq. 4, center or eq. 4, right). When fitting was performed using eq. 4, center, which has 2 parameters, we obtained the values used to generate the data ( $K_m = 50 \mu M$  and  $k_{cat} = 300 s^{-1}$ ). Results were almost identical by both minimization functions ( $K_m = 50.00$ ,  $SD = 0.01$  and  $k_{cat} = 300$ ,  $SD = 0.01$  for  $U$  and  $K_m = 50.00$ ,  $SD = 0.03$  and  $k_{cat} = 300$ ,  $SD = 0.14$  for  $U_{rel}$ ).

When 3 parameters were considered (eq. 4, right), fitting results were inconsistent (see table 2). Even when  $k_{cat}$  was fixed to  $300 s^{-1}$  the data still were not consistent, as  $k_1$  is 6 but  $k_{-1}$  becomes close to 0 and with huge SD values. The parameters and the SDs, calculated under different initial contour conditions are given in table 2. In summary, the robust fitting of data to eq. 4, center, shifts to a non-reliable fitting when using eq. 4, right, thus suggesting both that an assumption of the model provided by eq. 3 is not appropriate and that  $K_m$  cannot be an equilibrium constant. This fitting exercise using eq. eq. 4, right, in fact has not any rigor, as a "Michaelian"  $v_0/[S]$  plot leads to an equilateral hyperbola that is defined by just 2 parameters; hence, fitting to 3 parameters is impossible or, in other words, a vain actuation. Furthermore, the equilateral hyperbola cannot be described by 3 parameters ( $k_1$ ,  $k_{-1}$  and  $k_{cat}$ ) but by 2. Leaving aside the "Michaelis-Menten paradox" it is necessary to continue to work using the canonical model and the current approaches albeit with caution. On the one hand,  $K_m$  cannot be any more considered as a measure of substrate affinity. It should be noted that if  $K_d$  is the equilibrium dissociation constant of the ES complex in the model described in eq. 2, and assuming steady state conditions, one can analytically devise eq. 3, which shows that only if  $k_{cat} \ll k_{-1}$ ,  $K_m = k_{-1}/k_1 = K_d$ . The model predicts that  $K_m$  can be relatively close to  $K_d$  if  $k_{cat} < 0.05 \cdot k_{-1}$  (see Figure 1). This fact is known<sup>5</sup>, but many biochemists and Biochemistry textbooks are reluctant to consider that  $k_{cat}$  is, often, non negligible.

$K_m$  is a value obtained from  $v_0/[S]$  plots, whose meaning is quite straightforward: the concentration that provides half maximal

**Table 2** Parameters after fitting data to eq. 4, right, and using the data generated with  $K_m = 50 \mu M$  and  $V = 300$ ,  $[E] = 1 nM$  (Relative Units). The estimated standard deviation (SD) is given in parentheses.

| Initial values                                                   | Error type* | $k_{cat}$ ( $s^{-1}$ ) | $k_1$ ( $\mu M^{-1}s^{-1}$ ) | $k_{-1}$ ( $s^{-1}$ )                   |
|------------------------------------------------------------------|-------------|------------------------|------------------------------|-----------------------------------------|
| $k_1 = 0.01$<br>$k_{-1} = 1 \cdot 10^{-5}$<br>$k_{cat} = 1$      | A           | 300 (0.01)             | 6.0 ( $7 \cdot 10^{-4}$ )    | $5 \cdot 10^{-9}$ ( $7 \cdot 10^{-6}$ ) |
| $k_1 = 0.01$<br>$k_{-1} = 1 \cdot 10^{-5}$<br>$k_{cat} = 1$      | R           | 300 (0.15)             | 6.0 (0.002)                  | $6 \cdot 10^{-9}$ ( $5 \cdot 10^{-5}$ ) |
| $k_1 = 100$<br>$k_{-1} = 100$<br>$k_{cat} = 100$                 | A           | 300 (0.015)            | 26.1 (1.0)                   | 1010 (50.2)                             |
| $k_1 = 100$<br>$k_{-1} = 100$<br>$k_{cat} = 100$                 | R           | 300 (0.21)             | 22.4 (4.3)                   | 818 (216)                               |
| $k_1 = 1$<br>$k_{-1} = 1 \cdot 10^{-5}$<br>$k_{cat}$ fixed (300) | A           | –                      | 6.0 (0.5)                    | 0.099; (26)                             |
| $k_1 = 1$<br>$k_{-1} = 1 \cdot 10^{-5}$<br>$k_{cat}$ fixed (300) | R           | –                      | 6.0 (0.049)                  | $\cdot 10^{-6}$ (0.049)                 |

\* A: absolute error; R: relative error (eq.5)

reaction rate ( $[S]_{0.5}$ ). The classical mechanistic model (eq. 3) assumes that i) steady state occurs for each  $[S]$  and ii) [enzyme] is negligible ( $< 1000 \cdot [S]$ ). Taking these precautions, *in vitro* assays leads to a linear relationship between substrate consumption and time that, by definition, lasts until the steady state is no longer valid. At a given  $[S]$ :  $v_0 = k_{cat}[ES]$  and, therefore,  $v_0$  is constant only when  $[ES]$  is constant. From this fact two different approximations may be derived.

In terms of mechanisms, let us consider the two most common assumptions, for instance a rapid  $E + S = ES$  equilibrium; that is, the concentration of ES does not vary because  $k_1$  and  $k_{-1}$  are big and in few seconds the equilibrium is achieved. Then, both  $k_1$  and  $k_{-1}$  are higher than  $k_{cat}$  and  $K_m$  would be equivalent to  $k_{-1}/k_1$ , which reminds an equilibrium dissociation constant ( $K_d$ ). As discussed below,  $K_m$  cannot be an equilibrium constant as no equilibrium has been reached.

An alternative option is the so-called *quasi steady-state approximation* (QSSA), introduced in enzymology by Briggs and Haldane<sup>13</sup>. They assumed that within the period of time that the  $[ES]$  remains constant:  $k_{-1} \ll k_1$  and  $k_{-1}$  is negligible in front of  $k_{cat}$ . Whereas rapid equilibrium leads to a  $K_m \approx K_d$ , QSSA leads to a  $K_m \approx k_{cat}/k_1$ , which has nothing in common with an equilibrium constant. Whereas *in vitro* assays are performed in conditions of negligible enzyme concentration ( $[enzyme] < 1000 \cdot [S]$ ), in a physiological situation enzyme and metabolite concentrations are not so distant.

Surely, due to procedural factors, enzymologists have used  $K_m$  values to compare "affinities" of different compounds using sentences such as "the substrate with lower  $K_m$  has more affinity for the enzyme". This may happen as an exception for different reasons being Briggs and Haldane's QSSA the most likely. In short,  $K_m$  is indeed instrumental in Enzymology but cannot be used to define substrate affinity. The crucial question then is whether  $K_m$  is used in a reliable manner when introduced in any Systems Biology study/analysis.

The steady-state may be fulfilled in *in vitro* conditions, but may

be a rare phenomenon in physiological *in vivo* situations<sup>14-17</sup>. Enzymes are parts of a system; accordingly, real  $K_m$  value and meaning should be closely scrutinized in *in vivo* scenarios. In fact, each enzymatic step provides independent variables in Systems Biology approaches involving metabolic pathway-related calculations. We propose that the mechanistic meaning of  $K_m$  is apprehended in a "dynamic" framework. The conception may appear as trivial but conceptually what we propose is that  $K_m$  is equivalent in a dynamic situation to  $K_d$  in a static situation. Irrespective of the numeric values,  $K_d$  is the dissociation constant (of the reaction  $E + S = ES$ ) and  $K_m$  is the "steady-state" constant. Thus,  $K_d = [E]_{eq}[S]_{eq}/[ES]_{eq}$ , and  $K_m = [E]_{ss}[S]_{ss}/[ES]_{ss}$ , "eq" standing for equilibrium and "ss" standing for steady state. If  $[E]_T$  is the total amount of enzyme, we may consider:

$$[ES]_{ss} = \frac{[E]_T[S]_{ss}}{K_m + [S]_{ss}} \quad (6)$$

It is noteworthy that, for a given  $k_{cat}$ , the greater the  $K_m$ , the lower  $[ES]_{ss}$  and, consequently, the lower the reaction rate.

In any physiological system the majority of reactions are far from equilibrium and the flux (e.g. glycolytic versus gluconeogenic or vice versa) goes in one direction. For such reactions  $k_{-1}$  is negligible in front of  $k_{cat}$ , and in consequence, for a given  $k_{cat}$ , the higher the  $k_1$  the lower the  $K_m$  and the higher the flux provided by the catalytic step. In other words, in many *in vivo* physiological conditions, fluxes depend on  $k_1$ .

In steady state conditions as those used in the pioneering work by Kacser and Burns<sup>18-20</sup> to study metabolic control, when the system is perturbed by adding a small amount of a substrate  $S$ , the parameter that measures the change in the flux, the reaction velocity, is known as elasticity. Taking an unbranched metabolic system and being  $E$  a member of the reaction chain, an increase in the input leading to a change in metabolic flux leads to two phenomena that are deduced by the above considerations. The value of the flux at the new steady-state will be directly proportional to  $[ES]$ . Obviously, this applies to all enzymes in the unbranched metabolism. Elasticity, as elsewhere defined<sup>18,21,22</sup>, is given by:

$$\frac{d[ES]}{d[S]} \frac{[S]}{[ES]} = \frac{K_m}{K_m + [S]} = \frac{k_{-1} + k_{cat}}{k_{-1} + k_{cat} + k_1[S]} \quad (7)$$

Therefore, the higher the  $K_m$  value the lower the effect of a differential change of  $[S]$  on  $[ES]_{ss}$ . Again, if  $k_{cat} \gg k_{-1}$ , then elasticity becomes:  $k_{cat}/(k_{cat} + k_1[S]_{ss})$ . Thus, the greater the  $k_1$ , the lesser the relative impact of  $[S]$  variation in the flux.

The second phenomenon concerns time, i.e. it is related to the kinetics of achieving of a new steady state when a perturbation to the system is applied, namely when the value of a metabolite (substrate) concentration changes. Being  $[E]_T$  the amount of enzyme, from an initial state (A):  $[ES]_A = [E]_T[S]_A/(K_m + [S]_A)$ , a perturbation (a change of the substrate concentration) will lead to a new state (B), where:  $[ES]_B = [E]_T[S]_B/(K_m + [S]_B)$ . Taking the canonical model described in eq. 2), in which  $d[ES]/dt = k_1[E][S] - (k_{cat} + k_{-1})[ES]$ , analytical integration is possible and leads to the following relationship:

$$[ES]_B = [ES]_A(1 - e^{-(k_1[S] + k_{-1} + k_{cat})t}) \quad (8)$$



Thus, any perturbation in a step within a metabolic system will lead to a new steady state that depends on the  $[S]$  in the new steady state and on the kinetic constants of the enzymatic reaction. In eq. 8,  $t$  would be the time necessary to achieve the new steady state. Such variation in  $[ES]$  from steady state A to steady state B, if experimentally followed with reliability, will provide a specific constant ( $k_{obs}$ ) whose value is the exponent of  $e$ :  $k_{obs} = k_1[S] + k_{-1} + k_{cat}$ . If  $k_{-1}$  is negligible versus  $k_{cat}$  the equation becomes:  $k_{obs} = k_1[S] + k_{cat}$ . Hence,  $k_{obs}$  for a given metabolite concentration depends on  $k_1$  of the corresponding enzyme.

Elasticity gives information on the proportion of enzyme molecules that are occupied, and therefore engaged in the catalysis. The higher the  $K_m$  value the lower the degree of occupation (lower the  $[ES]$ ) and elasticity gives us an idea on how  $[ES]$  will change when  $[S]$  changes. In summary, elasticity measures the change while the kinetics to achieve the new steady state is defined by  $k_{obs}$ . The take home message from this latter part of the article is that depending on the actual value to metabolite (substrate) concentration, the new steady state would depend i) on  $k_1[S]$ , ii) on  $k_{cat}$  or iii) on  $k_1[S] + k_{cat}$ .

For instance, in cases of low  $[S]$ , the kinetics in achieving a new steady state will depend on  $k_{cat}$  (i.e. in an intrinsic property of the enzyme). Similarly, if the enzyme displays high  $k_{cat}$  values, the kinetics from passing to a different steady state will be similar within a wide range of substrate concentrations. Data calculated without any a priori assumption and using the above values for  $K_m$  and  $k_{cat}$  (table 3), tells that both  $k_1$  and  $[S]$  affect  $k_{obs}$ . At  $[S] = K_m$  ( $50\mu M$ ) the time in sec needed to pass to  $70\mu M$  is  $1.2 \cdot 10^{-5}$  for  $k_1 = 6.67 \cdot 10^7 M^{-1}s^{-1}$  and  $8.88 \cdot 10^{-5}$  for  $k_1 = 9.0 \cdot 10^6 M^{-1}s^{-1}$ . Interestingly, the time to reach a new steady state varies in a greater proportion than the  $[S]$ ; when  $k_1 = 6.67 \cdot 10^7 M^{-1}s^{-1}$  and initial  $[S] = 3.0 \cdot 10^{-5} M$ , the time to reach  $5.0 \cdot 10^{-5} M$  is  $4.34 \cdot 10^{-5} s$ , whereas if the starting substrate is 5 times higher, ( $[S] = 1.5 \cdot 10^{-4} M$ ), the time to pass to  $1.7 \cdot 10^{-4} M$  is about two orders of magnitude higher ( $7.45 \cdot 10^{-7} s$ ).

## Conclusions

The possibility to be certain about the concentration of substrate providing (*in vitro*) half maximum  $V$  makes  $K_m$  a valuable parameter in enzymology. However,  $K_m$  cannot be considered an equilibrium constant. In the right context, the "MM paradox" may be solved by considering  $K_m$  as the constant defining the steady state, which is the actual state occurring in *in vitro* enzymatic assays

aimed at  $K_m$  determination.

Apart from the specific property of an enzyme, i.e. its  $k_{cat}$ , the substrate-enzyme association rate constant appears as very relevant to understand the elasticity of the catalytic step in an overall system and to establish the period of time required to shift metabolic states, for instance in glycolysis from a resting situation to an anaerobic apnea. The higher the  $k_1$  value for enzymes in a given metabolism the quicker the response to any perturbation.  $k_1$  determination is a challenge that may be overcome by using stopped flow or BIAcore equipment that allow real-time measuring of the binding of two molecules. Alternatively,  $k_1$  may be deduced from progress  $[S]/t$  curves at different substrate concentrations<sup>23|24</sup>. Note that in such assays neither the  $k_{cat}$  nor the concentration of enzyme change; the development of novel numerical methods constitute an alternative for calculating association rates from a set of progress  $[S]$  versus time curves.

## Conflicts of interest

There are no conflicts to declare.

## Notes and references

- 1 I. H. Segel, *Enzyme kinetics: Behaviour and Analysis of Rapid Equilibrium and Steady-State Enzyme Systems*, John Wiley and Sons, New York, 1993.
- 2 L. Michaelis and M. Menten, *Biochem Z.*, 1913, **49**, 333–369.
- 3 K. A. Johnson and R. S. Goody, *Biochemistry*, 2011, **50**, 8264–8269.
- 4 H. Lineweaver and D. Burk, *J. Am. Chem. Soc.*, 1934, **56**, 658–666.
- 5 K. A. Johnson, *FEBS Lett.*, 2013, **587**, 2753–2766.
- 6 B. B. Knudsen and J. Dissing, *Clin. Genet.*, 1973, **4**, 344–347.
- 7 D. J. Porter and T. Spector, *J. Biol. Chem.*, 1993, **268**, 2480–2485.
- 8 G. Cercignani and S. Allegrini, *Anal. Biochem.*, 1991, **192**, 312–315.
- 9 J. J. Centelles, R. Franco, E. I. Canela and J. Bozal, *Neurochem. Res.*, 1986, **11**, 471–479.
- 10 J. J. Centelles, R. Franco and J. Bozal, *J. Neurosci. Res.*, 1988, **19**, 258–267.
- 11 J. L. Beltran, J. J. Pignatello and M. Teixido, *Comput. Geosci.*, 2016, **94**, 11–17.
- 12 M. L. Johnson and L. M. Faunt, *Methods Enzymol.*, 1992, **201**, 1–37.
- 13 G. E. Briggs and J. B. S. Haldane, *Biochem. J.*, 1925, **19**, 338–339.
- 14 A. Sols and R. Marco, in *Curr. Top. Cell. Regul.*, ed. B. Horecker and E. Stadtman, Academic Press, Inc., 1970, vol. 2, pp. 227–273.
- 15 O. H. Straus and A. Goldstein, *J. Gen. Physiol.*, 1943, **26**, 559–585.
- 16 P. A. Srere, *Science*, 1967, **158**, 936–937.
- 17 K. R. Albe, M. H. Butler and B. E. Wright, *J. Theor. Biol.*, 1990, **143**, 163–195.
- 18 R. Bohnsack, *Biomed. Biochim. Acta*, 1985, **44**, 1567–1578.
- 19 H. Kacser and J. A. Burns, *Symp. Soc. Exp. Biol.*, 1973, **27**, 65–104.
- 20 H. Kacser and J. A. Burns, *Biochem. Soc. Trans.*, 1979, **7**, 1149–1160.
- 21 M. Cascante, R. Franco and E. I. Canela, *Math Biosci.*, 1989, **92**, 271–288.
- 22 H. Kacser and J. A. Burns, *Biochem. Soc. Trans.*, 1983, **11**, 35–40.
- 23 R. Franco, J. M. Aran and E. I. Canela, *Biochem. J.*, 1991, **274** ( Pt 2), 509–511.
- 24 E. I. Canela and R. Franco, *Biochem. J.*, 1986, **233**, 599–605.

**Table 3** Determination of the time needed to attain a new steady state. For a given  $[S]$  in the table the value of  $[S]$  at the simulated new steady state would be  $20\mu M$  higher than the "starting" steady state, which was defined by  $10\mu M$   $[S]$  and  $0.17 M$   $[ES]_{ss}$  calculated using the same values used earlier for  $K_m$  ( $50\mu M$ ),  $k_{cat}$  ( $300 s^{-1}$ ) and  $E_T$  ( $1 nM$ ).  $k_{obs}$  and time ( $t$ ) to attain a new steady state were calculated (see text for details) using different  $k_1$  and  $k_{-1}$  values (note that fixing either value, the second one is related by the formula  $K_m = (k_{-1} + k_{cat})/k_1$ ).

| $[S]$<br>(M)        | $[ES]_{ss}$<br>(nM)  | $k_1 = 6.67 \cdot 10^7$<br>( $M^{-1}s^{-1}$ ) |                      | $k_1 = 3.67 \cdot 10^7$<br>( $M^{-1}s^{-1}$ ) |                      | $k_1 = 1.87 \cdot 10^7$<br>( $M^{-1}s^{-1}$ ) |                      | $k_1 = 1.27 \cdot 10^7$<br>( $M^{-1}s^{-1}$ ) |                      | $k_1 = 9.00 \cdot 10^6$<br>( $M^{-1}s^{-1}$ ) |                      |
|---------------------|----------------------|-----------------------------------------------|----------------------|-----------------------------------------------|----------------------|-----------------------------------------------|----------------------|-----------------------------------------------|----------------------|-----------------------------------------------|----------------------|
|                     |                      | $k_{obs}$<br>( $s^{-1}$ )                     | $t$<br>(s)           | $k_{obs}$<br>( $s^{-1}$ )                     | $t$<br>(s)           | $k_{obs}$<br>( $s^{-1}$ )                     | $t$<br>(s)           | $k_{obs}$<br>( $s^{-1}$ )                     | $t$<br>(s)           | $k_{obs}$<br>( $s^{-1}$ )                     | $t$<br>(s)           |
| $3.0 \cdot 10^{-5}$ | $3.75 \cdot 10^{-1}$ | $5.33 \cdot 10^3$                             | $4.34 \cdot 10^{-5}$ | $2.93 \cdot 10^3$                             | $7.90 \cdot 10^{-5}$ | $1.49 \cdot 10^3$                             | $1.55 \cdot 10^{-4}$ | $1.01 \cdot 10^3$                             | $2.29 \cdot 10^{-4}$ | $7.20 \cdot 10^2$                             | $3.22 \cdot 10^{-4}$ |
| $5.0 \cdot 10^{-5}$ | $5.00 \cdot 10^{-1}$ | $6.67 \cdot 10^3$                             | $1.20 \cdot 10^{-5}$ | $3.67 \cdot 10^3$                             | $2.18 \cdot 10^{-5}$ | $1.87 \cdot 10^3$                             | $4.28 \cdot 10^{-5}$ | $1.27 \cdot 10^3$                             | $6.31 \cdot 10^{-5}$ | $9.00 \cdot 10^2$                             | $8.88 \cdot 10^{-5}$ |
| $7.0 \cdot 10^{-5}$ | $5.83 \cdot 10^{-1}$ | $8.00 \cdot 10^3$                             | $5.26 \cdot 10^{-6}$ | $4.40 \cdot 10^3$                             | $9.55 \cdot 10^{-6}$ | $2.24 \cdot 10^3$                             | $1.88 \cdot 10^{-5}$ | $1.52 \cdot 10^3$                             | $2.77 \cdot 10^{-5}$ | $1.08 \cdot 10^3$                             | $3.89 \cdot 10^{-5}$ |
| $9.0 \cdot 10^{-5}$ | $6.43 \cdot 10^{-1}$ | $9.33 \cdot 10^3$                             | $2.80 \cdot 10^{-6}$ | $5.13 \cdot 10^3$                             | $5.10 \cdot 10^{-6}$ | $2.61 \cdot 10^3$                             | $1.00 \cdot 10^{-5}$ | $1.77 \cdot 10^3$                             | $1.48 \cdot 10^{-5}$ | $1.26 \cdot 10^3$                             | $2.08 \cdot 10^{-5}$ |
| $1.1 \cdot 10^{-4}$ | $6.88 \cdot 10^{-1}$ | $1.07 \cdot 10^4$                             | $1.68 \cdot 10^{-6}$ | $5.87 \cdot 10^3$                             | $3.05 \cdot 10^{-6}$ | $2.99 \cdot 10^3$                             | $5.99 \cdot 10^{-6}$ | $2.03 \cdot 10^3$                             | $8.83 \cdot 10^{-6}$ | $1.44 \cdot 10^3$                             | $1.24 \cdot 10^{-5}$ |
| $1.3 \cdot 10^{-4}$ | $7.22 \cdot 10^{-1}$ | $1.20 \cdot 10^4$                             | $1.09 \cdot 10^{-6}$ | $6.60 \cdot 10^3$                             | $1.98 \cdot 10^{-6}$ | $3.36 \cdot 10^3$                             | $3.88 \cdot 10^{-6}$ | $2.28 \cdot 10^3$                             | $5.72 \cdot 10^{-6}$ | $1.62 \cdot 10^3$                             | $8.05 \cdot 10^{-6}$ |
| $1.5 \cdot 10^{-4}$ | $7.50 \cdot 10^{-1}$ | $1.33 \cdot 10^4$                             | $7.45 \cdot 10^{-7}$ | $7.33 \cdot 10^3$                             | $1.35 \cdot 10^{-6}$ | $3.73 \cdot 10^3$                             | $2.66 \cdot 10^{-6}$ | $2.53 \cdot 10^3$                             | $3.92 \cdot 10^{-6}$ | $1.80 \cdot 10^3$                             | $5.52 \cdot 10^{-6}$ |
